# Supplementary material
Source: Springer Nature journal article supplement (https://www.springermedizin.de/resource/supplementary/12888_2013_1428_MOESM2_ESM.pdf/9480192)
Supplement: MOESM2 [file 9480192]

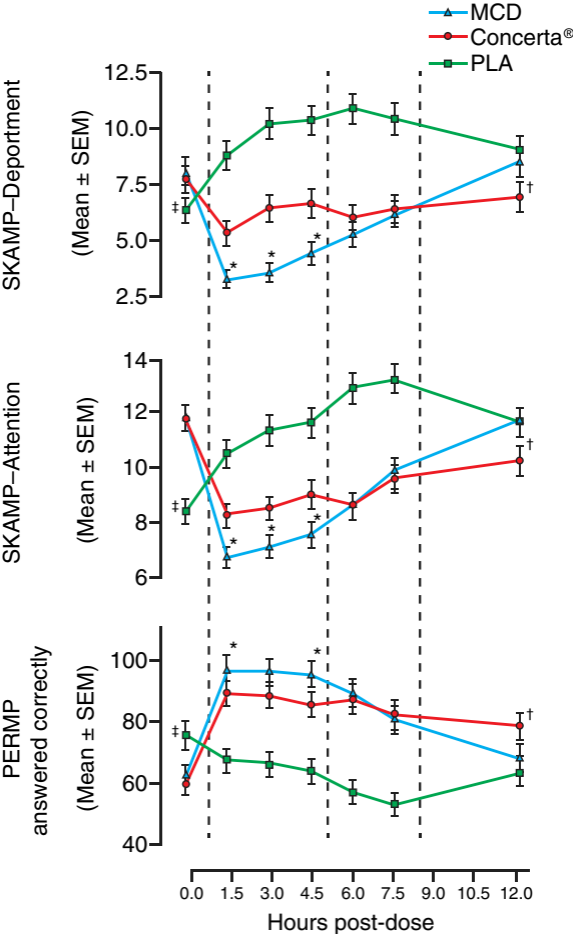

### Effect size at each hour post-dose

|                  | 0.0   | 1.5  | 3.0  | 4.5  | 6.0  | 7.5  | 12.0 |
|------------------|-------|------|------|------|------|------|------|
| SKAMP-Department |       |      |      |      |      |      |      |
| MCD              | -0.23 | 0.82 | 0.89 | 0.80 | 0.76 | 0.54 | 0.06 |
| Concerta®        | -0.18 | 0.52 | 0.50 | 0.50 | 0.66 | 0.51 | 0.25 |
| SKAMP-Attention  |       |      |      |      |      |      |      |
| MCD              | -0.59 | 0.70 | 0.72 | 0.66 | 0.65 | 0.50 | 0.00 |
| Concerta®        | -0.58 | 0.41 | 0.48 | 0.42 | 0.64 | 0.53 | 0.20 |
| PERMP # correct  |       |      |      |      |      |      |      |
| MCD              | -0.27 | 0.57 | 0.56 | 0.59 | 0.58 | 0.50 | 0.10 |
| Concerta®        | -0.33 | 0.42 | 0.42 | 0.40 | 0.54 | 0.53 | 0.28 |
